# Supplementary material for: Psychometric Qualities Evaluation of the Interdependent Happiness Scale across Malaysia, Philippines, and India
Source: MDPI journal article supplement (doi:10.3390/ijerph19010187), 2021-12-24
Supplement: s1 [file s1]

Supplementary Table S1

*Factor loading, descriptive statistics, and reliability of the Interdependent Happiness Scale with 8 items*

| Item/Factor                     | Malaysia ( <i>n</i> = 263) |          |           |          |          | India ( <i>n</i> = 310) |          |           |          |          |
|---------------------------------|----------------------------|----------|-----------|----------|----------|-------------------------|----------|-----------|----------|----------|
|                                 | FL                         | <i>M</i> | <i>SD</i> | $\alpha$ | $\omega$ | FL                      | <i>M</i> | <i>SD</i> | $\alpha$ | $\omega$ |
| Relationship-oriented happiness | .770                       | 3.72     | 0.71      | .688     | .693     | .941                    | 3.90     | 0.77      | .853     | .854     |
| IHS2                            | .759                       | 3.60     | 0.85      |          |          | .846                    | 3.85     | 0.86      |          |          |
| IHS3                            | .694                       | 3.83     | 0.78      |          |          | .878                    | 3.94     | 0.80      |          |          |
| Quiescent happiness             | .896                       | 3.47     | 0.76      | .652     | .642     | 1.00                    | 3.79     | 0.78      | .792     | .844     |
| IHS4                            | .643                       | 3.90     | 0.85      |          |          | .798                    | 3.94     | 0.81      |          |          |
| IHS5                            | .586                       | 3.00     | 1.11      |          |          | .759                    | 3.57     | 1.10      |          |          |
| IHS6                            | .634                       | 3.50     | 1.02      |          |          | .791                    | 3.86     | 0.85      |          |          |
| Ordinary happiness              | .939                       | 3.35     | 0.83      | .795     | .705     | .925                    | 3.72     | 0.84      | .900     | .895     |
| IHS7                            | .708                       | 3.28     | 1.00      |          |          | .862                    | 3.71     | 0.91      |          |          |
| IHS8                            | .634                       | 3.22     | 1.01      |          |          | .880                    | 3.71     | 0.89      |          |          |
| IHS9                            | .785                       | 3.54     | 0.94      |          |          | .853                    | 3.74     | 0.96      |          |          |
| 8-item IHS                      | -                          | 3.49     | 0.64      | .830     | .840     | -                       | 3.79     | 0.74      | .931     | .956     |

*Note.* FL = standardized factor loading, *M* = mean, *SD* = standard deviation,  $\alpha$  = Cronbach alpha coefficient,  $\omega$  = McDonald omega coefficient, IHS: overall interdependent happiness scale score with 8 items.

Supplementary Table S2

*Correlation, squared correlation, and average variance extracted of the Interdependent Happiness Scale with 8 items*

|                 | 1       | 2       | 3       | 4       | 5    | AVE  |
|-----------------|---------|---------|---------|---------|------|------|
| <b>Malaysia</b> |         |         |         |         |      |      |
| 1.IHS           | 1       | .513    | .719    | .764    | .080 | .457 |
| 2.Relationship  | .716*** | 1       | .205    | .239    | .106 | .532 |
| 3.Quirescent    | .848*** | .453*** | 1       | .325    | .044 | .381 |
| 4.Ordinary      | .874*** | .489*** | .570*** | 1       | .043 | .501 |
| 5.Creativity    | .284*** | .325*** | .209**  | .208**  | 1    | -    |
| <b>India</b>    |         |         |         |         |      |      |
| 1.IHS           | 1       | .748    | .903    | .880    | .404 | .689 |
| 2.Relationship  | .865*** | 1       | .591    | .498    | .441 | .741 |
| 3.Quirescent    | .950*** | .769*** | 1       | .692    | .329 | .605 |
| 4.Ordinary      | .938*** | .706*** | .832*** | 1       | .308 | .748 |
| 5.Creativity    | .636*** | .664*** | .574*** | .555*** | 1    | -    |

*Note.* AVE: average variance extracted; IHS: overall interdependent happiness scale score with 8 items; Relationship: relationship-oriented happiness score with items 2 and 3. Above diagonal line is the squared correlation coefficient.

\*\*  $p < .01$ , \*\*\*  $p < .001$
